# Supplementary material
Source: Springer Nature journal article supplement (https://www.springermedizin.de/resource/supplementary/12890_2011_276_MOESM2_ESM.pdf/9504848)

**'Low  
Impact'**

**'Medium  
Impact'**

**'High  
Impact'**

**'Very high  
Impact'**

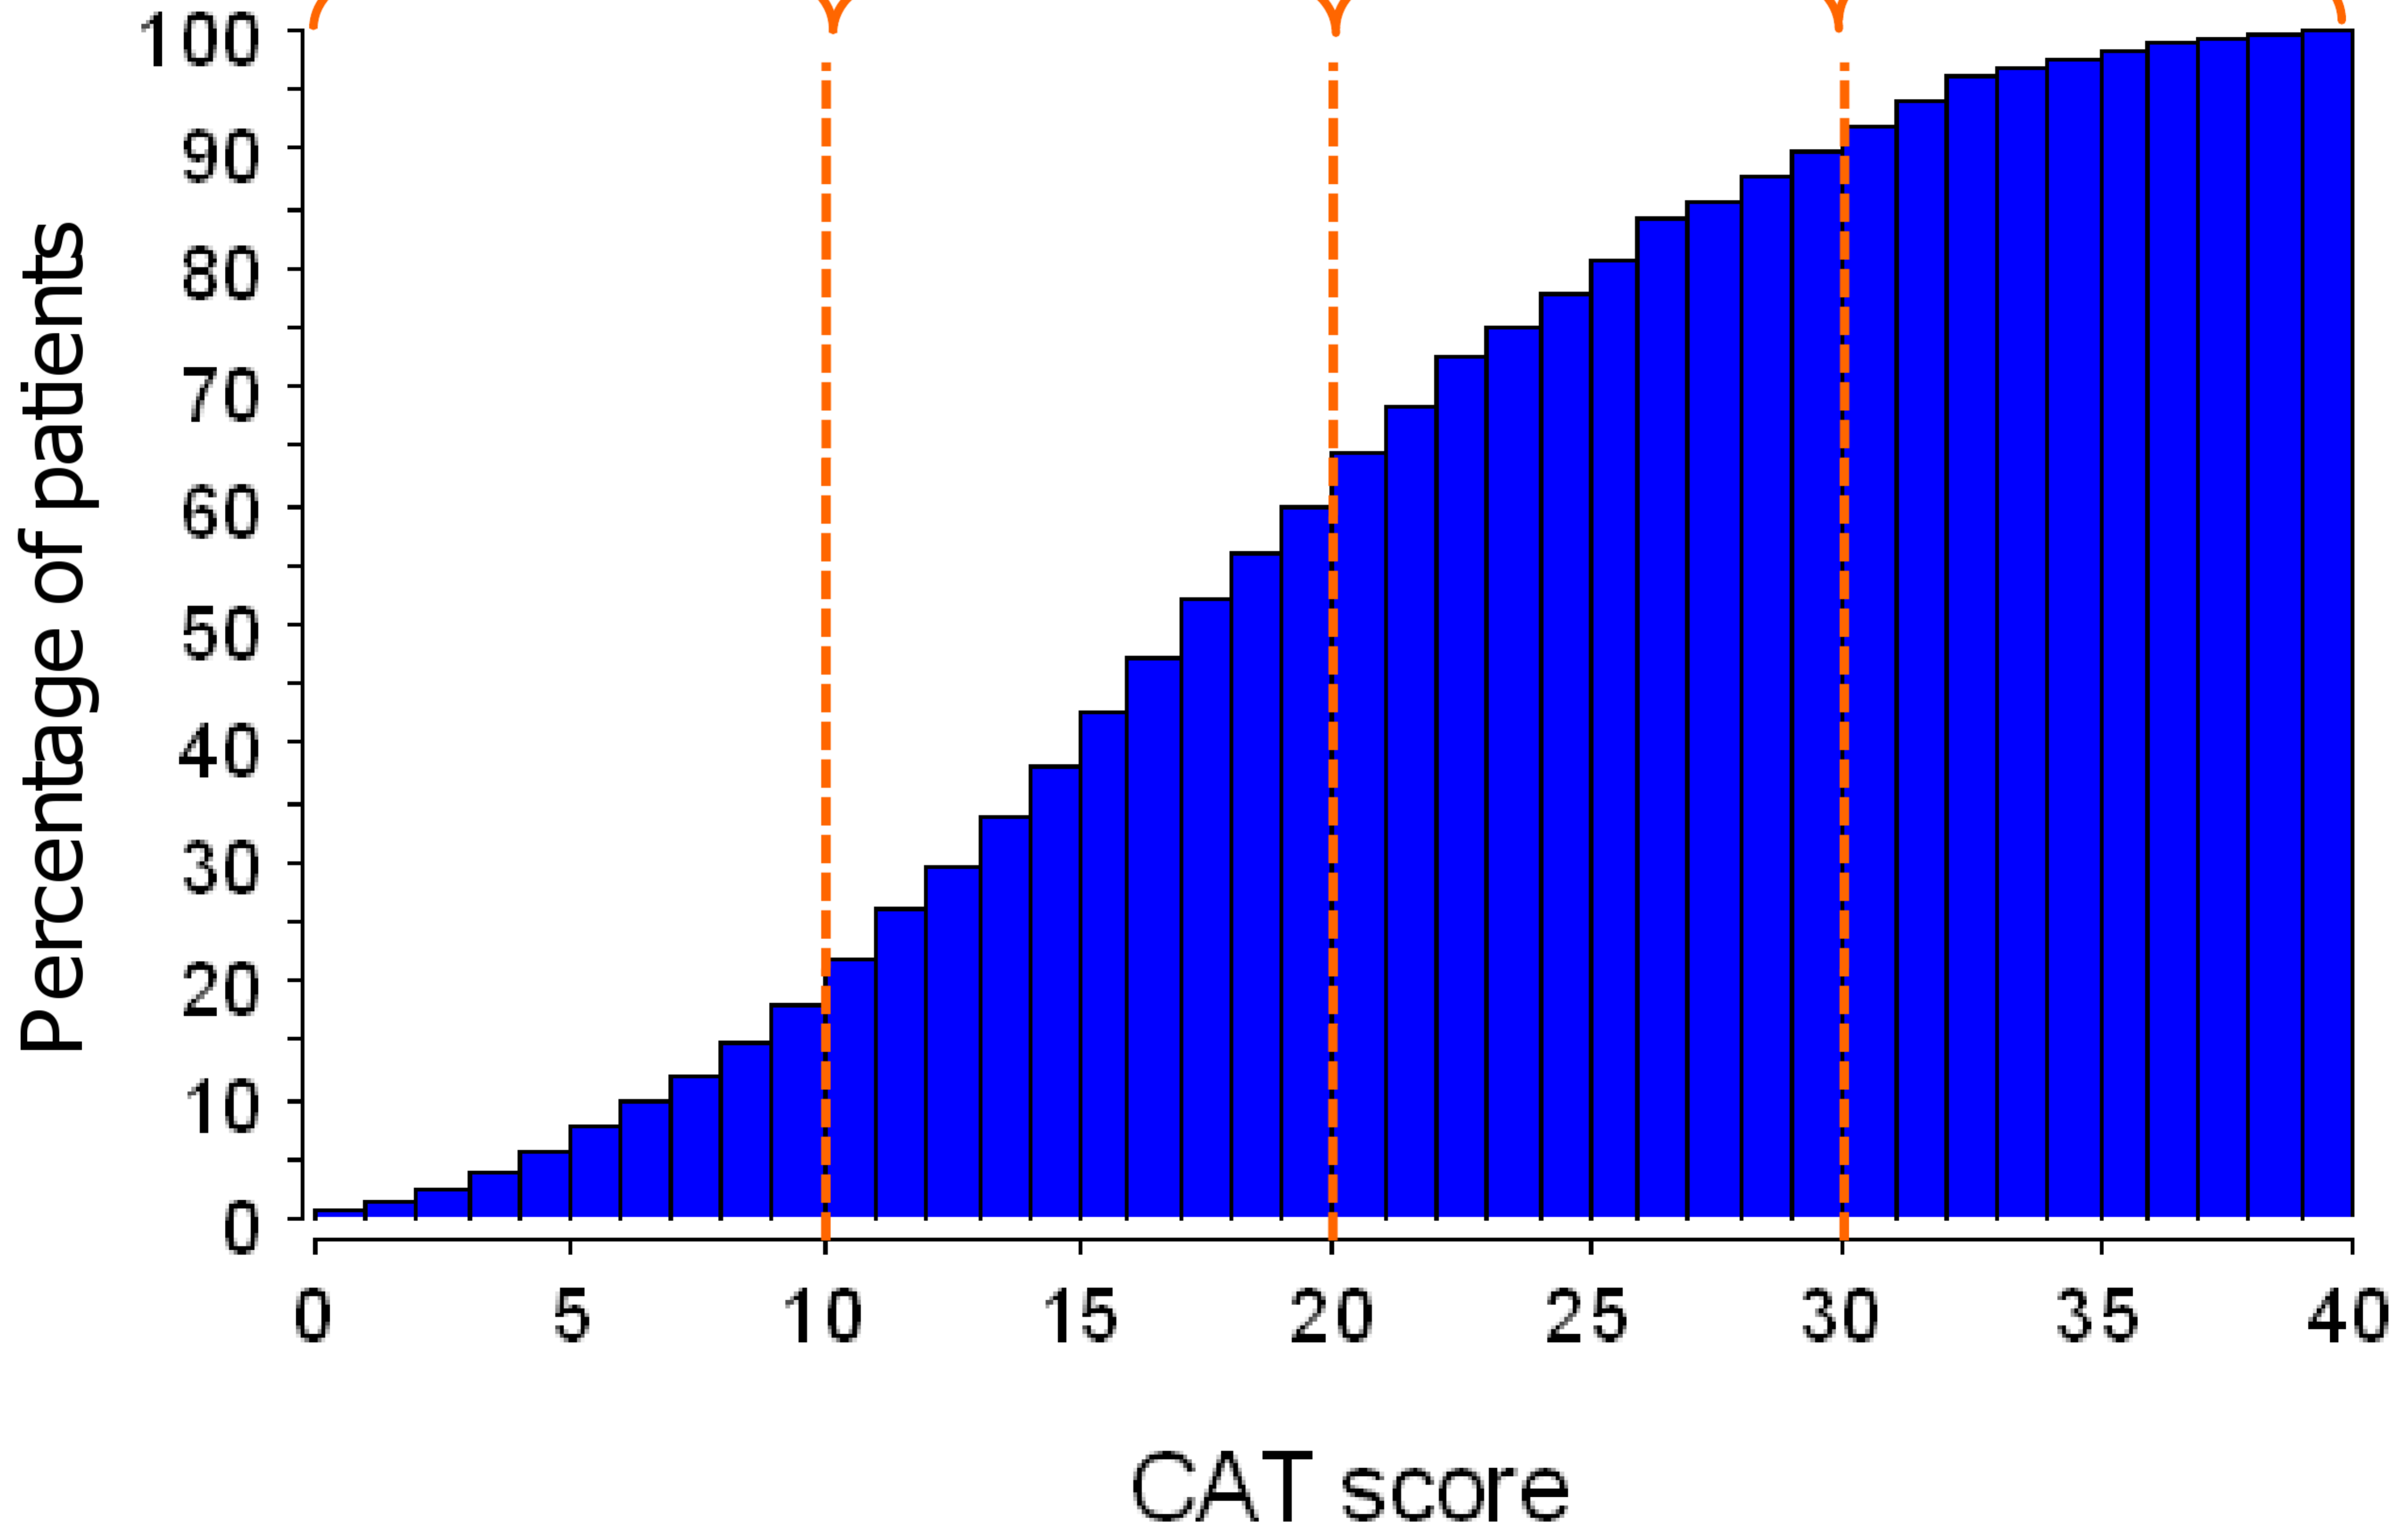

Supplement: MOESM2 [file 9504848]
